# Supplementary material for: Ethylene Response Factors Are Controlled by Multiple Harvesting Stresses in Hevea brasiliensis
Source: PLoS One. 2015 Apr 23;10(4):e0123618. doi: 10.1371/journal.pone.0123618 (PMC4408094; doi:10.1371/journal.pone.0123618)
Supplement: S1 Table — (XLSX) [file pone.0123618.s001.xlsx]

## Sheet: S1 Table
	Supplementary Table 1. List of primer sequences for 47 genes of Hevea brasiliensis AP2/ERF superfamily.
	Gene	Contig accession number in the global library	Primer sequences		Primer efficiency
			Forward	Reverse
	HbERF-Ib4	hevea_454_rep_c9307	GGAGAATATGCCAGGCTGAA	TGCGAAGGAGCTGACAGAAT	2.00
	HbERF-Ib7	hevea_454_rep_c15743	AGGTGACTTCGCAAGGCTTA	CTGGGCTTTCTTCTTGTTCG	2.00
	HbERF-Ib11	hevea_454_rep_c35059	GGGCCAAAACCTATCAAGAA	GAATCAGAGCGTAACAAAGCA	2.00
	HbERF-IIb2	hevea_454_rep_c19971	TCAAGGATGATGAGGAGTAGCA	GAACAGATGGTTGTGGTGGA	2.00
	HbERF-IIIb1	hevea_454_rep_c38925	TGTCATTCTCGGTGAGGTGA	CGATTCCAGATCGGAAGAGA	2.00
	HbERF-IIIe1	hevea_454_rep_c4496	CGTCCGAGTTGAAGAACGAT	AATCCCACAACAAACCTTGC	2.00
	HbERF-IVa3	hevea_454_rep_c22480	TGCAGGTTCAGACTCCACTACT	TTCCAGCTCGTTCTTCACTTC	2.00
	HbERF-Va2	hevea_454_c35642	TTCGAAACGGCTGAAGACGCTG	TTGTTGGTCATTGCAGCGAGGC	2.00
	HbERF-VI1	hevea_454_rep_c51930	AAGCCGACAGTTAGCTCAGG	TCTCCGATACGCTCGATTCT	2.00
	HbERF-VI3	hevea_454_rep_c37430	CAGAAGCCGGTAGAACCAGT	TCGTTGCTATTGTGTCATCG	2.00
	HbERF-VI5	hevea_454_c22933	TCGAGATCCAAACCGCCGGAAA	GACATGACGGCGCTTGGTGAAT	2.00
	HbERF-VI-L3	hevea_454_rep_c6308	TTCTGTGGCAGCCTCTCAGT	GATCTGCAACATCTGCATCA	2.00
	HbERF-VI-L4	hevea_454_rep_c13569	CCGAAGAATCAAGTGAAGCA	CCTTCTCTGCCTTCTCCTCAA	2.00
	HbERF-VIIa1	hevea_454_rep_c16874	CGAGGAGAATTCTGGGTCTG	TCTGCACTTCGCTCTCTTGA	2.00
	HbERF-VIIa12	hevea_454_rep_c110	AGATGAAGCCTGACTCTGGAA	CTCCACAGGTCCATTGGATT	2.00
	HbERF-VIIa20	hevea_454_rep_c710	AACGTTTCTGGGATTGGAG	TTGGAACCCTAAACACACCA	2.00
	HbERF-VIIIa4	hevea_454_rep_c2227	GCTGACAACAGCAACGGCAACA	TTCTGCAGCTCAAGGACGGTGA	2.00
	HbERF-VIIIa8	hevea_454_rep_c10220	GACCATGATCGTAGCCCTTG	GTCAGTTTTCCTCCGGTCTC	2.00
	HbERF-VIIIa9	hevea_454_rep_c4136	CAGGGGAAGAACATAAAGCAC	CCTCAAAATCAGGCAACTTCC	2.00
	HbERF-VIIIa10	hevea_454_rep_c1402	CTCCGATCAACACCAAGGTT	ATAAACTCGGGCCTGCTTCT	2.00
	HbERF-VIIIa12	hevea_454_rep_c4279	GCCGTTGGATCTTAATCTCG	GACATCGCCTGATCATGAAG	2.00
	HbERF-VIIIa13	hevea_454_rep_c20048	TTCAACGGAGAAGCCTCAG	AGCTCATCGTCAGTCGGTAA	2.00
	HbERF-VIIIa14	hevea_454_rep_c34700	CACGCCAGCTACTGGTCTTT	TACCAGCACTAGCACCACCA	2.00
	HbERF-VIIIb1	hevea_454_rep_c11109	TGGAAACCCTCATGTTCCAT	CTGGAGGGATTCACCAAAGA	2.00
	HbERF-IXa3	hevea_454_c31433	AGGAGAAAGAAGGGTGTGAGC	TTTGGTGCAACTCAATGTGC	1.94
	HbERF-IXb1	hevea_454_c13287	AGTGGCGACGGATTCTGGTGAA	AGTGCACAAGCCAGGGAACTCA	1.99
	HbERF-IXb2	hevea_454_c19752	GAGAGGAAGAGTCACCGGATT	CAGCAGATGAAGCAAGGAAG	1.95
	HbERF-IXb3	hevea_454_rep_c9973	GGAAACGACCCAGAGAAAGC	GGATATCCTAACGCTGGATGG	2.08
	HbERF-IXc1	hevea_454_rep_c12109	TGGAGTCGGAGAGCAGTACA	TGCTGTAATGGCCAATGGT	2.00
	HbERF-IXc4	hevea_454_rep_c3873	GAAGCAAGAGAGAAAGGGATG	TTCCTACCACTGAAAGGAGGAG	2.00
	HbERF-IXc5	hevea_454_rep_c36947	GGAATCACTCAAGGACATGAAG	TTCACCAAGGTCGAGCATTC	2.00
	HbERF-IXc6	hevea_454_rep_c18341	TGAGAGAGTCGCTTCAAGACA	GGACTTCCTACACATGATGAGC	2.00
	HbERF-Xa2	hevea_454_rep_c8880	TTCAACAGCAAGATCCGATG	CCCATAACAAAGATGCTGACTG	2.00
	HbERF-Xa8	hevea_454_c51284	CATTGGTGTTGGATGTTAGTGG	ACTCTGACTGGTGGACTCTCCT	2.00
	HbERF-Xb1	hevea_454_rep_c21830	CCTATGATAAGGCGGCGATA	TCACTTTCCTTCCCCTTTCC	1.95
	HbAP2-1	hevea_454_c41136	AGCAACGGGGAAGATACCA	AAAGGCGAACCTGATTGTGA	2.00
	HbAP2-3	hevea_454_c24965	TACTGCCGCAAACAACTGAC	CCTGTCTTTCTTGCCTGCTC	2.00
	HbAP2-5	hevea_454_rep_c25399	ACCGGAAGTTGGTAGTGGCAGT	AGCTGCGTTTTCCGGCAGTA	2.00
	HbAP2-6	hevea_454_rep_c16078	AATGCCAGCGAGTTACCAAG	TGGTTGTCGAACAAGATGGA	2.00
	HbAP2-7	hevea_454_c17771	AAACTGGCACCACAATGCT	GCCCATGCAAAAACTTAACC	2.00
	HbAP2-8	hevea_454_rep_c12362	CCATTCCCTCACAGAAGAACA	TGAGTTCCCATCTTGGTTGA	2.00
	HbAP2-9	hevea_454_rep_c24306	GCGGCATTCGTCTTGGTTCTGT	ATAAGCGTTGCACATGGCGGGA	2.00
	HbAP2-10	hevea_454_rep_c22185	GAGGGAGGAGTGACCACAATCT	GCAACCCTTTCCTGAATCCTT	2.00
	HbAP2-11	hevea_454_c58670*	GCCGCTCCTGATTCTTTCCTCT	TGCTGAAAGCGTGGGCGAAA	2.00
	HbAP2-13	hevea_454_c19894	CCTCCTGCTACCTCTGCATT	CATACTGAAGGCTGTTGTGCTT	2.00
	HbAP2-15	hevea_454_c50010	GGCTCAGATTGGAAAGTGGT	TCCCTAGTCTTGTGGCTGATT	2.00
	HbRAV-4	hevea_454_rep_c24256	CAAAATGGGTCTCTGCTAAGGT	TCATGTTCCTGTTTCGTGGA	2.00
