# Supplementary material for: Ethylene Response Factors Are Controlled by Multiple Harvesting Stresses in Hevea brasiliensis
Source: PLoS One. 2015 Apr 23;10(4):e0123618. doi: 10.1371/journal.pone.0123618 (PMC4408094; doi:10.1371/journal.pone.0123618)
Supplement: S6 Table — The analysis was carried out in the -2kb region upstream of the start codon (ATG). (XLSX) [file pone.0123618.s006.xlsx]

## Sheet: S6 Table
	Supplementary Table 6. Number of copy of cis-acting regulatory elements involved in HbERF-IX promoter region using in silico pattern matching search against PLACE. The analysis was carried out in -2kb region upstream start codon (ATG).
	No	Name	Name standing	Core motif	Expected function	Database ID	Gene and corresponding scaffolds
							sc139	scaff2511	scaff2511_2	sc17055	sc424	sc16383	sc106	scaff8135
							HbERF-IXa3	HbERF-IXb1	HbERF-IXb2	HbERF-IXb3	HbERF-IXc1	HbERF-IXc4	HbERF-IXc5	HbERF-IXc6
	1	ABRE	ABA-responsive elements	ACGTG	ABA signalling	S000406, S000414, S000013, S000130	15	1	1	5	6	8	0	0
	2	erd1	Early responsive to dehydration	ACGT	Dehydration response	S000132, S000394, S000415	16	2	2	4	8	4	8	4
	3	Amylase box	Alpha-amylase family	TAACARA	Amylase storage	S000020, S000021	2	3	1	1	1	1	2	1
	4	ARE1	Antioxidant-response element	RGTGACNNNGC	Oxidative stress response	S000022	0	0	0	0	0	1	1	0
	5	ARF	Auxin Responsive Factor	TGTCTC	Auxin signalling	S000270	0	2	0	1	0	1	0	0
	6	ANAERO	Anaerobic set 1	AGCAGC	Fermentative pathways	S000477, S000478, S000479	6	2	3	3	7	2	1	4
	7	ARR1	Arabidopsis Response Regulator 1	NGATT	Cytokinin signalling	S000454	21	28	27	22	32	43	17	20
	8	CAAT-box	−	CAAT	Enhancer element	S000028	23	27	15	27	31	28	26	18
	9	Mem1	Mesophyll expression module 1	YACT	Secondary metabolism	S000449	21	29	15	20	20	32	25	24
	10	SOC1	SUPPRESSOR OF OVEREXPRESSION OF CO1	CCWWWWWWGG	Flowering development	S000404, S000431	4	8	4	8	8	10	2	2
	11	DRE/CRT Variant I	Cold Binding Factor 1	RYCGAC	Low temperature response	S000497	0	2	2	0	1	0	0	0
	12	HSE	Heat-shock element	CCAAT	Heat-shock element	S000030	4	1	1	7	3	2	7	2
	13	JERE	Jasmonate- and elicitor-responsive element	CGAC	Jasmonate signalling	S000205	2	3	1	4	7	2	2	0
	14	CAREs	CAACTC regulatory element	CAACTC	Seed development	S000421	0	1	3	0	0	0	0	0
	15	CaM	Calmodulin-binding protein	VCGCGB	Secondary metabolism	S000501	0	0	2	0	0	0	0	0
	16	CuRE	Copper-response element	GTAC	Secondary metabolism	S000493	4	2	2	2	6	4	0	0
	17	CT-rich	−	TCTCTCTCT	Enhancer element	S000460	2	0	0	0	0	0	0	4
	18	DOF	DNA-binding with one finger	AAAG	Multiple responses in stress and development	S000265	43	27	20	27	37	30	23	40
	19	DRE/CRT Variant II	Dehydration Response Element Binding	RCCGAC	Dehydration response	S000402, S000418, S000411	0	0	3	0	2	0	0	0
	20	RRE	R-response element	CANNTG	Secondary metabolism	S000144	22	20	20	16	18	22	22	18
	21	EIRE	Elicitor responsive element	TTGACC	Multiple responses in stress and development	S000142	1	0	2	1	2	2	0	0
	22	ERE	Ethylene responsive element	AWTTCAAA	Primary ethylene signalling	S000037	1	1	1	1	2	1	4	3
	23	GARE	GA-responsive element	TAACAAR	Gibberellin signalling	S000439	3	1	1	1	1	1	4	1
	24	GATA	GATA binding factor	GATA	Light response	S000039	11	19	17	8	12	15	17	20
	25	GCC-box	AP2/ERF binding element	GCCGCC	Ethylene signalling	S000430	1	1	1	0	0	1	2	0
	26	GT-1	−	GRWAAW	Light response	S000198, S000453, S000051, S000378	55	34	35	46	59	39	31	32
	27	HBP-1	Histone DNA Binding Protein-1	ACGTCA	Transcription regulation	S000053	0	0	0	0	0	0	0	0
	28	I-box	−	GATAA	Light response	S000124, S000199, S000424	10	12	8	4	4	9	7	6
	29	LTRE	Low temperature responsive element	CCGAC	Low temperature response	S000153, S000250	0	0	7	1	2	0	1	0
	30	MYB	MYB	CNGTTR	Multiple responses in stress and development	S000176, S000180, S000502, S000408, S000181, S000167, S000179	18	30	5	17	22	10	19	14
	31	E-box	MYC	CANNTG	Jasmonate signalling	S000407	22	20	20	18	20	24	24	18
	32	P1BS	Phosphate starvation responsive genes	GNATATNC	Stress related response	S000459	0	2	0	0	0	0	0	0
	33	POLLEN1	Pollen specific element	AGAAA	Pollen specific expression	S000245	15	10	12	12	12	13	9	18
	34	PRE	Pro- or hyposmolarity-responsive element	ACTCAT	Dehydration response	S000450	0	1	1	0	0	1	0	1
	35	Pyrimidine box	Pyrimidine box of GA-responsive element	CCTTTT	Gibberellin signalling	S000259	7	3	2	2	6	2	2	4
	36	RAV1-A	RAV1-binding element A	CAACA	Tissue-specific expression	S000314	2	7	1	5	7	4	4	6
	37	RAV1-B	RAV1-binding element B	CACCTG	Tissue-specific expression	S000315	0	1	0	1	1	0	2	0
	38	RHEs	Root Hair-specific cis-Elements	KCACGW	Root hair development	S000512	5	1	1	1	3	0	2	0
	39	ro1D	Root-motif	ATATT	Root -specific expression	S000098	14	9	14	13	11	22	27	30
	40	RY/G-box	RY/G repeats	CATGCA	Seed-specific expression	S000264, S000105, S000100, S000102	5	11	0	0	4	1	0	0
	41	SORLIPs	Sequences Over-Represented in Light-Induced Promoters	GCCAC	Light response	S000482, S000483	0	2	3	4	2	3	3	0
	42	SURE	Sulfur-responsive element	GAGAC	Secondary metabolism	S000499	1	5	1	1	1	0	1	0
	43	T/G-box	T/G repeats	AACGTG	Jasmonate signalling	S000458	0	0	0	0	0	0	0	0
	44	TATA-box	Goldberg-Hogness box	TATA	Transcription regulation	S000109, S000110, S000203	28	9	17	31	26	33	42	46
	45	W-box	WRKY-binding element	TGAC	Multiple responses in stress and development	S000310, S000390, S000442, S000447	47	14	23	23	33	18	31	12
